# Supplementary material
Source: PubMed Central journal article supplement (PMC9410765)

### IL-12p70

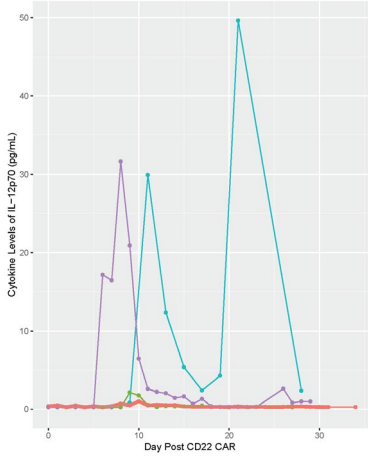

### IL-13

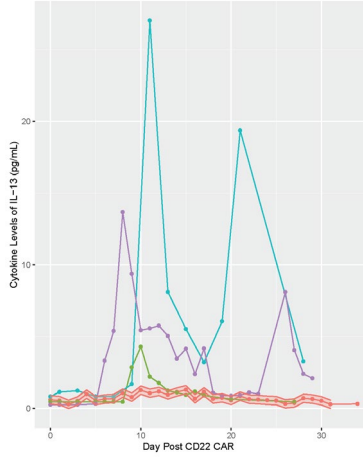

### IL-2

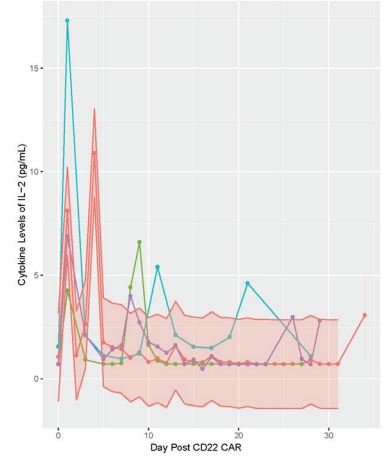

### IL-4

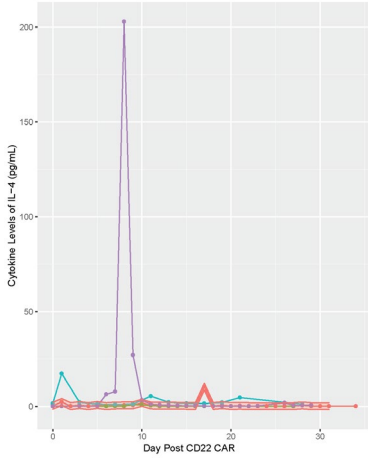

### MIP-α

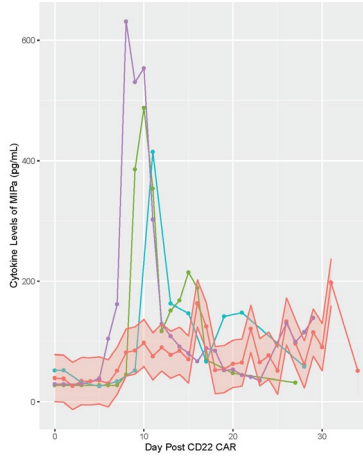

### TNFα

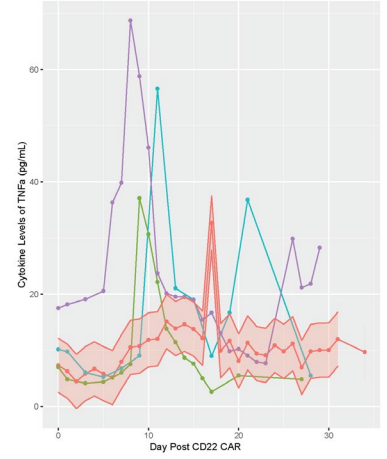

### GM-CSF

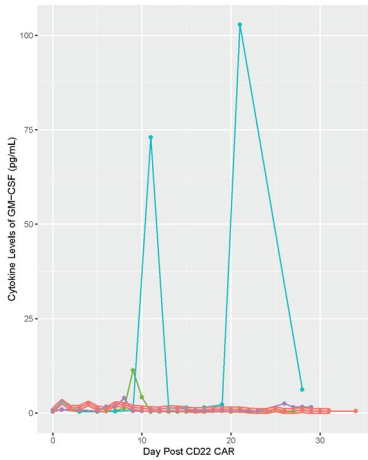

### IL-15

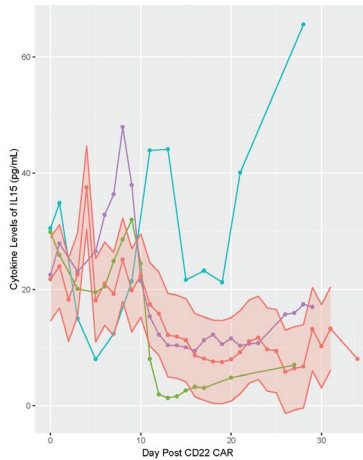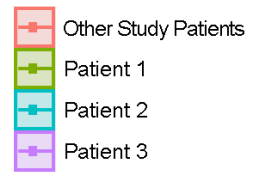

Supplement: NIHMS1730560-supplement-Supplemental_Figure.pdf [file NIHMS1730560-supplement-Supplemental_Figure.pdf]
